# Supplementary material
Source: PubMed Central journal article supplement (PMC5950014)
Supplement: supp_RA118.002233_135745_1_supp_86946_p4xsyx.pdf [file supp_RA118.002233_135745_1_supp_86946_p4xsyx.pdf]

**Cross-talk between chromatin acetylation and TRIM24 SUMOylation impacts cell adhesion**

**Srikanth Appikonda<sup>1,4</sup>, Kaushik N. Thakkar<sup>1,2,5</sup>, Parantu K. Shah<sup>3,6</sup>, Sharon Y.R. Dent<sup>1,2</sup>, Jannik N. Andersen<sup>3,7</sup>, Michelle C. Barton<sup>1,2,\*</sup>**

**Supplementary Table S1:** List of differentially expressed genes with fold change between WT TRIM24-expressing and SUMO mutant-expressing MCF7 cells (DM).

**Supplementary Table S2:** List of enriched biological process and cellular component gene ontology terms from DAVID pathway analysis

**Supplementary Table S3:** List of cloning and qPCR primers

**Supplementary Table S4:** List of antibodies used for immunoblot and immunoprecipitation experiments.

Supp. Table 1

| hgnc_symbol | ensembl_gene_id | gene_biotype         | baseMean_WT | baseMean_DM | fold Change |
|-------------|-----------------|----------------------|-------------|-------------|-------------|
| ABCC3       | ENSG00000108846 | protein_coding       | 2294.751843 | 1741.766869 | 0.759021885 |
| ABLIM1      | ENSG00000099204 | protein_coding       | 752.8425663 | 1009.505425 | 1.340925009 |
| ACE2        | ENSG00000130234 | protein_coding       | 125.5279924 | 55.23380668 | 0.44001187  |
| ACYP2       | ENSG00000170634 | protein_coding       | 287.0581202 | 386.7399927 | 1.347253276 |
| ADA         | ENSG00000196839 | protein_coding       | 300.2538611 | 193.7833716 | 0.645398433 |
| ADAMTSL1    | ENSG00000178031 | protein_coding       | 2.290688233 | 22.79241226 | 9.950028089 |
| ADI1        | ENSG00000182551 | protein_coding       | 5564.361649 | 7298.030916 | 1.311566605 |
| ADPRH       | ENSG00000144843 | protein_coding       | 109.9635624 | 189.312525  | 1.721593233 |
| ADRA2A      | ENSG00000150594 | protein_coding       | 116.9916245 | 206.9428185 | 1.768868663 |
| AMOTL1      | ENSG00000166025 | protein_coding       | 5117.269314 | 6890.539762 | 1.3465267   |
| ANK1        | ENSG00000029534 | protein_coding       | 289.925428  | 455.2287772 | 1.570158162 |
| ANO7        | ENSG00000146205 | protein_coding       | 386.7698088 | 692.5493456 | 1.790598257 |
| ANXA6       | ENSG00000197043 | protein_coding       | 2726.721003 | 3647.345457 | 1.337630602 |
| ARHGAP36    | ENSG00000147256 | protein_coding       | 234.6484002 | 328.3091212 | 1.399153461 |
| ASPH        | ENSG00000198363 | protein_coding       | 1843.567605 | 1360.615961 | 0.73803421  |
| ASTL        | ENSG00000188886 | protein_coding       | 36.95343741 | 67.73522325 | 1.832988431 |
| AZGP1       | ENSG00000160862 | protein_coding       | 432.2457381 | 270.3972984 | 0.625563828 |
| BMPER       | ENSG00000164619 | protein_coding       | 130.8434232 | 199.6738263 | 1.526051683 |
| BRINP2      | ENSG00000198797 | protein_coding       | 2642.820665 | 1829.784616 | 0.692360492 |
| BST2        | ENSG00000130303 | protein_coding       | 1480.174581 | 962.0986863 | 0.649990007 |
| BTF3P7      | ENSG00000219986 | processed_pseudogene | 331.6956751 | 244.6139253 | 0.737464922 |
| BTG3        | ENSG00000154640 | protein_coding       | 183.3584165 | 122.8908018 | 0.670221766 |
| CACNA1I     | ENSG00000100346 | protein_coding       | 251.0200969 | 172.129652  | 0.685720602 |
| CALCR       | ENSG00000004948 | protein_coding       | 277.3335816 | 398.9883118 | 1.43865849  |
| CALML5      | ENSG00000178372 | protein_coding       | 1265.872511 | 1884.380329 | 1.488601982 |
| CASC9       | ENSG00000249395 | lincRNA              | 75.21659259 | 41.09932508 | 0.546413014 |
| CCDC152     | ENSG00000198865 | protein_coding       | 505.601361  | 748.6607173 | 1.480733192 |
| CCDC82      | ENSG00000149231 | protein_coding       | 349.277081  | 260.0640122 | 0.744577948 |
| CD36        | ENSG00000135218 | protein_coding       | 81.95754348 | 44.73477777 | 0.54582868  |
| CDH18       | ENSG00000145526 | protein_coding       | 428.1471961 | 645.5282575 | 1.507725061 |
| CDKN2D      | ENSG00000129355 | protein_coding       | 1080.893328 | 820.5026549 | 0.75909679  |
| CDSN        | ENSG00000204539 | protein_coding       | 215.1782663 | 329.7558635 | 1.532477556 |
| CEP295NL    | ENSG00000178404 | protein_coding       | 465.0656979 | 336.0549494 | 0.722596723 |
| CFB         | ENSG00000243649 | protein_coding       | 4267.268414 | 3062.563243 | 0.717687041 |
| CHCHD10     | ENSG00000250479 | protein_coding       | 1325.219847 | 981.0311821 | 0.740278064 |
| CHI3L2      | ENSG00000064886 | protein_coding       | 156.6917832 | 99.60643368 | 0.635683835 |
| CLSTN3      | ENSG00000139182 | protein_coding       | 2653.437641 | 1988.893297 | 0.749553435 |
| CNN2        | ENSG00000064666 | protein_coding       | 717.5873984 | 514.0041555 | 0.716294847 |
| CNTD2       | ENSG00000105219 | protein_coding       | 687.0681877 | 1022.557752 | 1.488291512 |
| COL3A1      | ENSG00000168542 | protein_coding       | 14591.90612 | 9288.339684 | 0.636540532 |
| COL6A2      | ENSG00000142173 | protein_coding       | 1577.586013 | 1116.156916 | 0.707509389 |
| COL6A3      | ENSG00000163359 | protein_coding       | 598.3055667 | 796.7998722 | 1.331760753 |
| CPT1C       | ENSG00000169169 | protein_coding       | 195.9416506 | 116.1695004 | 0.592878033 |
| CRABP1      | ENSG00000166426 | protein_coding       | 1335.657382 | 938.5924885 | 0.702719501 |
| CSGALNACT1  | ENSG00000147408 | protein_coding       | 255.5253869 | 184.2752385 | 0.721162154 |
| CST9        | ENSG00000173335 | protein_coding       | 31.48296658 | 67.38795879 | 2.140457718 |
| CTNND2      | ENSG00000169862 | protein_coding       | 1770.151242 | 2626.891695 | 1.483992798 |
| CTSO        | ENSG00000256043 | protein_coding       | 42.58708656 | 85.0504415  | 1.997094621 |
| CYP26B1     | ENSG00000003137 | protein_coding       | 43.47187418 | 112.4717745 | 2.587230862 |
| DCLK1       | ENSG00000133083 | protein_coding       | 5242.135514 | 3845.181407 | 0.733514309 |
| DLX1        | ENSG00000144355 | protein_coding       | 268.8594225 | 424.4782677 | 1.578811201 |
| DNAAF3      | ENSG00000167646 | protein_coding       | 904.6371455 | 687.657881  | 0.760147739 |
| DOCK8       | ENSG00000107099 | protein_coding       | 1430.86954  | 1880.313447 | 1.31410544  |
| DUSP2       | ENSG00000158050 | protein_coding       | 292.0352328 | 392.8659465 | 1.345269003 |
| EDN1        | ENSG00000078401 | protein_coding       | 158.5173462 | 226.5950474 | 1.42946531  |
| EFCAB2      | ENSG00000203666 | protein_coding       | 302.2804075 | 395.7648134 | 1.309263861 |
| EPHA4       | ENSG00000116106 | protein_coding       | 915.8733396 | 1264.343084 | 1.380478096 |
| EPHB2       | ENSG00000133216 | protein_coding       | 374.7397492 | 284.6654892 | 0.75963516  |
| ERMAP       | ENSG00000164010 | protein_coding       | 633.4511422 | 844.8209708 | 1.333679766 |
| ERO1LB      | ENSG00000086619 | protein_coding       | 388.0187557 | 286.7107005 | 0.738909386 |

|           |                 |                      |             |             |             |
|-----------|-----------------|----------------------|-------------|-------------|-------------|
| FAM110B   | ENSG00000169122 | protein_coding       | 434.4545987 | 628.3568861 | 1.446311969 |
| FAM133A   | ENSG00000179083 | protein_coding       | 42.48037589 | 13.56381024 | 0.319295909 |
| FAM65C    | ENSG00000042062 | protein_coding       | 223.0590586 | 469.5702598 | 2.105138714 |
| FAM71E1   | ENSG00000142530 | protein_coding       | 523.2267836 | 724.1063573 | 1.383924486 |
| FAM84A    | ENSG00000162981 | protein_coding       | 586.0979706 | 820.7087174 | 1.400292713 |
| FBLN1     | ENSG00000077942 | protein_coding       | 913.2921838 | 656.4022867 | 0.718721016 |
| FGFR2     | ENSG00000066468 | protein_coding       | 292.2395643 | 401.6007574 | 1.374217616 |
| FN1       | ENSG00000115414 | protein_coding       | 2929.706521 | 1874.37424  | 0.639782254 |
| FRMD3     | ENSG00000172159 | protein_coding       | 213.7092024 | 308.9880207 | 1.445833952 |
| GABRP     | ENSG00000094755 | protein_coding       | 16.92295574 | 43.61649344 | 2.577356704 |
| GEMIN2P2  | ENSG00000235339 | processed_pseudogene | 408.2808425 | 303.1088435 | 0.742402807 |
| GJA1      | ENSG00000152661 | protein_coding       | 442.2923254 | 230.6086058 | 0.521394093 |
| GJB7      | ENSG00000164411 | protein_coding       | 110.4698397 | 186.1271632 | 1.684868592 |
| GNG4      | ENSG00000168243 | protein_coding       | 289.1540467 | 205.4459411 | 0.710506885 |
| GP1BB     | ENSG00000203618 | protein_coding       | 377.509441  | 285.624118  | 0.756601258 |
| GPFR1     | ENSG00000164850 | protein_coding       | 1730.686967 | 2502.403675 | 1.445901958 |
| GPNMB     | ENSG00000136235 | protein_coding       | 239.6001499 | 344.2204369 | 1.436645332 |
| GRIK3     | ENSG00000163873 | protein_coding       | 549.6809607 | 775.8696553 | 1.411490866 |
| GSC       | ENSG00000133937 | protein_coding       | 479.2510246 | 662.4326157 | 1.382224725 |
| GSTA2     | ENSG00000244067 | protein_coding       | 70.56918049 | 35.20134142 | 0.498820323 |
| GYG2      | ENSG00000056998 | protein_coding       | 1575.828892 | 1179.102395 | 0.748242656 |
| H19       | ENSG00000130600 | processed_transcript | 7298.574865 | 4336.900773 | 0.594212001 |
| HECW2     | ENSG00000138411 | protein_coding       | 603.1783653 | 861.8451885 | 1.42883969  |
| HEG1      | ENSG00000173706 | protein_coding       | 74.59929792 | 126.4746936 | 1.695387183 |
| HIST1H2AI | ENSG00000196747 | protein_coding       | 707.5575683 | 1004.960316 | 1.42032304  |
| HSPG2     | ENSG00000142798 | protein_coding       | 3165.704825 | 2101.369733 | 0.663792062 |
| IFI27     | ENSG00000165949 | protein_coding       | 918.307098  | 469.2978482 | 0.511046739 |
| IFITM10   | ENSG00000244242 | protein_coding       | 7644.964504 | 5777.561938 | 0.755734305 |
| IGSF1     | ENSG00000147255 | protein_coding       | 18132.18564 | 13329.7071  | 0.73514067  |
| JAZF1     | ENSG00000153814 | protein_coding       | 231.5035462 | 145.1721979 | 0.627084121 |
| KCNF1     | ENSG00000162975 | protein_coding       | 88.66978096 | 148.0529791 | 1.669711795 |
| KCNK5     | ENSG00000164626 | protein_coding       | 168.9840763 | 231.7350461 | 1.371342503 |
| KCTD12    | ENSG00000178695 | protein_coding       | 117.0892436 | 182.4989079 | 1.558630855 |
| KIF21B    | ENSG00000116852 | protein_coding       | 339.5635437 | 230.0815568 | 0.677580268 |
| KLHL4     | ENSG00000102271 | protein_coding       | 1570.781923 | 2237.85286  | 1.424674442 |
| KNDC1     | ENSG00000171798 | protein_coding       | 2258.321912 | 1685.287026 | 0.746256331 |
| KREMEN2   | ENSG00000131650 | protein_coding       | 293.469841  | 173.0958258 | 0.589824921 |
| KRT18P4   | ENSG00000229222 | processed_pseudogene | 429.470307  | 577.2959457 | 1.344204562 |
| L3MBTL3   | ENSG00000198945 | protein_coding       | 505.43148   | 386.2526619 | 0.764203809 |
| LAMB1     | ENSG00000091136 | protein_coding       | 287.713698  | 181.266897  | 0.630025259 |
| LANCL2    | ENSG00000132434 | protein_coding       | 981.7783592 | 1359.037032 | 1.38426053  |
| LBX2-AS1  | ENSG00000257702 | antisense            | 309.1883588 | 435.9932579 | 1.410121842 |
| LCN2      | ENSG00000148346 | protein_coding       | 1530.031883 | 1097.913841 | 0.717575792 |
| LDHBP2    | ENSG00000213684 | processed_pseudogene | 81.9785985  | 48.99913118 | 0.597706378 |
| LDLRAD2   | ENSG00000187942 | protein_coding       | 658.1515236 | 387.9072359 | 0.589388951 |
| LDLRAD4   | ENSG00000168675 | protein_coding       | 238.676604  | 319.0461833 | 1.336730027 |
| LGALS3BP  | ENSG00000108679 | protein_coding       | 5548.581903 | 4069.564719 | 0.733442308 |
| LINC00494 | ENSG00000235621 | lincRNA              | 532.238324  | 784.3679625 | 1.473715678 |
| LINC01116 | ENSG00000163364 | lincRNA              | 132.9345667 | 193.9979794 | 1.459349395 |
| LINC01270 | ENSG00000203999 | lincRNA              | 222.7571075 | 149.8476289 | 0.672695164 |
| LINC01522 | ENSG00000237423 | lincRNA              | 590.6008741 | 893.0569428 | 1.51211585  |
| LRG1      | ENSG00000171236 | protein_coding       | 687.6754162 | 490.2388551 | 0.712892803 |
| LRP8      | ENSG00000157193 | protein_coding       | 825.9780533 | 625.7456286 | 0.757581422 |
| LY6G5C    | ENSG00000204428 | protein_coding       | 175.1565388 | 242.1595336 | 1.382532078 |
| LYPD1     | ENSG00000150551 | protein_coding       | 497.6473469 | 669.8846077 | 1.346103043 |
| MAOA      | ENSG00000189221 | protein_coding       | 1545.610196 | 1164.021567 | 0.753114576 |
| MAOB      | ENSG00000069535 | protein_coding       | 372.4481053 | 571.1251196 | 1.533435428 |
| MARC2     | ENSG00000117791 | protein_coding       | 335.2558842 | 445.8137746 | 1.329771663 |
| MFS2B     | ENSG00000205639 | protein_coding       | 77.88052937 | 41.90101021 | 0.538016505 |
| MMP16     | ENSG00000156103 | protein_coding       | 1104.816603 | 1619.153284 | 1.465540326 |
| MTND4P12  | ENSG00000247627 | processed_pseudogene | 1159.774458 | 831.4484721 | 0.716905314 |
| MTND6P4   | ENSG00000249119 | processed_pseudogene | 1225.976157 | 884.9413367 | 0.721825895 |
| MUC16     | ENSG00000181143 | protein_coding       | 367.8629037 | 757.3872164 | 2.058884461 |

|            |                 |                      |             |             |             |
|------------|-----------------|----------------------|-------------|-------------|-------------|
| MUC5B      | ENSG00000117983 | protein_coding       | 19181.15869 | 14116.48456 | 0.735955778 |
| NCKAP5     | ENSG00000176771 | protein_coding       | 1592.882971 | 2183.888554 | 1.371028878 |
| NPIP5      | ENSG00000243716 | protein_coding       | 11832.26453 | 6930.464013 | 0.585725919 |
| OLFML3     | ENSG00000116774 | protein_coding       | 78.43800827 | 116.2195577 | 1.481674003 |
| PADI3      | ENSG00000142619 | protein_coding       | 520.485326  | 267.2209533 | 0.513407276 |
| PAR3B      | ENSG00000116117 | protein_coding       | 361.1214735 | 495.3747002 | 1.371767498 |
| PCP4       | ENSG00000183036 | protein_coding       | 1466.399367 | 917.5375898 | 0.625707846 |
| PCSK2      | ENSG00000125851 | protein_coding       | 388.1690138 | 615.4473416 | 1.585513835 |
| PDE9A      | ENSG00000160191 | protein_coding       | 1037.283155 | 787.0079721 | 0.758720479 |
| PDK4       | ENSG00000004799 | protein_coding       | 1158.390073 | 858.4911961 | 0.741107176 |
| PDZK1      | ENSG00000174827 | protein_coding       | 173.1835913 | 250.8048228 | 1.448201997 |
| PEPD       | ENSG00000142499 | protein_coding       | 918.1066028 | 1201.583513 | 1.308762522 |
| PGM5       | ENSG00000154330 | protein_coding       | 193.2226847 | 317.2901213 | 1.642095605 |
| PHEX       | ENSG00000102174 | protein_coding       | 94.67141208 | 159.8831427 | 1.68882178  |
| PISD       | ENSG00000241878 | protein_coding       | 3965.719207 | 5402.23535  | 1.362233448 |
| PLAT       | ENSG00000104368 | protein_coding       | 34.1751351  | 16.54546849 | 0.484137618 |
| PLCH1      | ENSG00000114805 | protein_coding       | 1421.690506 | 1071.54908  | 0.753714733 |
| PLD1       | ENSG00000075651 | protein_coding       | 2296.608518 | 1633.569995 | 0.711296672 |
| PPP1R3C    | ENSG00000119938 | protein_coding       | 712.1896577 | 956.4261581 | 1.342937443 |
| PRKAR1B    | ENSG00000188191 | protein_coding       | 1528.28288  | 2091.562759 | 1.36857043  |
| PSCA       | ENSG00000167653 | protein_coding       | 331.7607562 | 531.9033136 | 1.603273756 |
| PSORS1C1   | ENSG00000204540 | protein_coding       | 252.9686383 | 362.5330892 | 1.433114759 |
| PTTG1      | ENSG00000164611 | protein_coding       | 902.3593698 | 687.7701496 | 0.762190955 |
| RCAN1      | ENSG00000159200 | protein_coding       | 488.6152384 | 361.0467844 | 0.738918388 |
| RCOR2      | ENSG00000167771 | protein_coding       | 331.1075726 | 201.1205067 | 0.607417418 |
| REEP1      | ENSG00000068615 | protein_coding       | 286.1800324 | 523.6814844 | 1.829902248 |
| RIMKLA     | ENSG00000177181 | protein_coding       | 203.9860982 | 338.7146422 | 1.660479048 |
| RPL15P2    | ENSG00000240914 | processed_pseudogene | 799.829669  | 578.4565313 | 0.723224649 |
| RSPO1      | ENSG00000169218 | protein_coding       | 364.1060252 | 222.5671519 | 0.61127017  |
| S1PR5      | ENSG00000180739 | protein_coding       | 348.5310591 | 238.172155  | 0.683359915 |
| SAMD5      | ENSG00000203727 | protein_coding       | 88.47837151 | 5.642797095 | 0.063776005 |
| SEMA6B     | ENSG00000167680 | protein_coding       | 1981.676444 | 1396.107842 | 0.704508471 |
| SEPP1      | ENSG00000150722 | protein_coding       | 762.5781085 | 1122.843828 | 1.472431238 |
| SEPT5      | ENSG00000184702 | protein_coding       | 1475.339605 | 1030.505961 | 0.698487289 |
| SERPINA1   | ENSG00000197249 | protein_coding       | 4312.363915 | 3272.165858 | 0.758787042 |
| SETD9      | ENSG00000155542 | protein_coding       | 270.7098721 | 361.3084059 | 1.334670225 |
| SHISA2     | ENSG00000180730 | protein_coding       | 226.7762214 | 348.4694006 | 1.536622307 |
| SIM1       | ENSG00000112246 | protein_coding       | 40.78784101 | 90.86850139 | 2.227833078 |
| SLC25A45   | ENSG00000162241 | protein_coding       | 284.7746122 | 412.5588939 | 1.448720764 |
| SLC26A2    | ENSG00000155850 | protein_coding       | 416.7248585 | 557.7246356 | 1.338352211 |
| SLC7A8     | ENSG00000092068 | protein_coding       | 455.3923604 | 344.5395305 | 0.756577318 |
| SLC8A1     | ENSG00000183023 | protein_coding       | 798.2223128 | 1097.583941 | 1.375035405 |
| SLIT1      | ENSG00000187122 | protein_coding       | 191.7756345 | 325.6223677 | 1.697933987 |
| SMPDL3B    | ENSG00000130768 | protein_coding       | 425.681842  | 557.5603346 | 1.309805304 |
| SORCS2     | ENSG00000184985 | protein_coding       | 522.8382235 | 375.5752488 | 0.71833931  |
| SOST       | ENSG00000167941 | protein_coding       | 3.258260934 | 38.02270104 | 11.66963046 |
| SOX3       | ENSG00000134595 | protein_coding       | 2797.43709  | 3825.472412 | 1.367491846 |
| ST6GALNAC5 | ENSG00000117069 | protein_coding       | 50.34920367 | 127.8790835 | 2.539843219 |
| STARD4     | ENSG00000164211 | protein_coding       | 166.5488753 | 229.2956346 | 1.376746821 |
| STRA6      | ENSG00000137868 | protein_coding       | 329.3164601 | 239.8784296 | 0.728413118 |
| STS        | ENSG00000101846 | protein_coding       | 369.3659429 | 491.2266135 | 1.329918535 |
| SUSD2      | ENSG00000099994 | protein_coding       | 357.8742197 | 469.2358703 | 1.311175392 |
| SYNDIG1    | ENSG00000101463 | protein_coding       | 186.3912968 | 262.7314718 | 1.409569418 |
| SYT15      | ENSG00000204176 | protein_coding       | 270.3150898 | 366.685817  | 1.356512569 |
| TBX4       | ENSG00000121075 | protein_coding       | 275.6266897 | 198.9578983 | 0.72183829  |
| TCAF2      | ENSG00000170379 | protein_coding       | 556.4314719 | 778.4766109 | 1.399052085 |
| TCAF2P1    | ENSG00000159860 | processed_pseudogene | 146.0762365 | 215.7287807 | 1.476823239 |
| TGFB2      | ENSG00000092969 | protein_coding       | 31.85621453 | 59.90172472 | 1.880377992 |
| TIMP2      | ENSG00000035862 | protein_coding       | 4582.591888 | 3250.506111 | 0.709316079 |
| TMCC3      | ENSG00000057704 | protein_coding       | 270.6878579 | 183.3988562 | 0.677528936 |
| TNS4       | ENSG00000131746 | protein_coding       | 528.1397761 | 364.8442314 | 0.690809986 |
| TP53I3     | ENSG00000115129 | protein_coding       | 566.6364532 | 779.953691  | 1.376462257 |
| TRPV3      | ENSG00000167723 | protein_coding       | 351.3926235 | 264.637182  | 0.753109668 |

|           |                 |                       |             |             |             |
|-----------|-----------------|-----------------------|-------------|-------------|-------------|
| TSPY26P   | ENSG00000235217 | libed_processed_pseu  | 302.5871393 | 436.8603121 | 1.443750429 |
| TUBA4A    | ENSG00000127824 | protein_coding        | 479.6529825 | 357.2959576 | 0.74490511  |
| TUBB8P7   | ENSG00000261812 | polymorphic_pseudogen | 100.703668  | 156.4005374 | 1.55307687  |
| UBE2L6    | ENSG00000156587 | protein_coding        | 1325.848622 | 963.7147141 | 0.726866324 |
| UGT1A1    | ENSG00000241635 | protein_coding        | 1044.026978 | 571.0030408 | 0.546923646 |
| UGT1A10   | ENSG00000242515 | protein_coding        | 1029.653112 | 563.9191013 | 0.547678723 |
| UGT1A3    | ENSG00000243135 | protein_coding        | 991.9570071 | 546.5291858 | 0.550960558 |
| UGT1A4    | ENSG00000244474 | protein_coding        | 1009.702065 | 552.8283336 | 0.547516295 |
| UGT1A5    | ENSG00000240224 | protein_coding        | 991.3942646 | 545.1464124 | 0.549878522 |
| UGT1A6    | ENSG00000167165 | protein_coding        | 1228.806611 | 660.992915  | 0.537914517 |
| UGT1A7    | ENSG00000244122 | protein_coding        | 1086.917448 | 594.6305357 | 0.547079759 |
| UGT1A8    | ENSG00000242366 | protein_coding        | 992.3168561 | 547.123403  | 0.551359578 |
| UGT1A9    | ENSG00000241119 | protein_coding        | 992.2833595 | 545.530761  | 0.549773163 |
| ULBP2     | ENSG00000131015 | protein_coding        | 367.6753217 | 275.9764059 | 0.750598122 |
| VGLL3     | ENSG00000206538 | protein_coding        | 32.23711795 | 1.339933759 | 0.041564936 |
| VSIG10L   | ENSG00000186806 | protein_coding        | 296.3208828 | 214.373805  | 0.72345156  |
| VWA7      | ENSG00000204396 | protein_coding        | 572.7644162 | 405.8529982 | 0.708586265 |
| XIST      | ENSG00000229807 | lincRNA               | 3359.343334 | 1848.559701 | 0.550274121 |
| ZBED3-AS1 | ENSG00000250802 | antisense             | 225.0411007 | 327.5676565 | 1.455590358 |
| ZBTB18    | ENSG00000179456 | protein_coding        | 95.18008118 | 54.65129261 | 0.574188338 |
| ZDHC2     | ENSG00000177108 | protein_coding        | 105.4113775 | 158.5587383 | 1.504189984 |
| ZDHC8P1   | ENSG00000133519 | libed_unprocessed_pse | 206.1083463 | 295.1357821 | 1.431944836 |
| ZNF135    | ENSG00000176293 | protein_coding        | 429.1578304 | 323.3089189 | 0.753356681 |
| ZNF204P   | ENSG00000204789 | processed_pseudogen   | 748.8980939 | 486.9041246 | 0.650160721 |
| ZNF486    | ENSG00000256229 | protein_coding        | 259.1865626 | 186.8531764 | 0.720921542 |
| ZNF804A   | ENSG00000170396 | protein_coding        | 113.039986  | 202.4746059 | 1.791176848 |
| ZSWIM5P1  | ENSG00000235430 | processed_pseudogen   | 135.1151967 | 200.9819804 | 1.487486125 |
|           | ENSG00000231699 | processed_pseudogen   | 30.17229256 | 6.95662886  | 0.230563483 |
|           | ENSG00000244076 | processed_pseudogen   | 33.63344761 | 9.301795546 | 0.276563844 |
|           | ENSG00000215022 | antisense             | 58.66066374 | 22.71580193 | 0.387240793 |
|           | ENSG00000224814 | antisense             | 64.73885888 | 29.13752112 | 0.450077768 |
|           | ENSG00000227854 | processed_pseudogen   | 119.8292674 | 57.34887252 | 0.478588193 |
|           | ENSG00000243779 | processed_pseudogen   | 184.489648  | 92.28523748 | 0.500219056 |
|           | ENSG00000129951 | protein_coding        | 364.1261151 | 218.6344717 | 0.60043612  |
|           | ENSG00000259884 | lincRNA               | 314.8526297 | 208.1840998 | 0.661211247 |
|           | ENSG00000231916 | processed_pseudogen   | 218.3972877 | 153.3315821 | 0.702076402 |
|           | ENSG00000244255 | protein_coding        | 3882.732346 | 2776.669348 | 0.715132824 |
|           | ENSG00000233461 | antisense             | 260.7455918 | 187.945924  | 0.720801923 |
|           | ENSG00000198832 | protein_coding        | 478.0504124 | 349.2356972 | 0.730541567 |
|           | ENSG00000261578 | sense_overlapping     | 1649.634323 | 1237.036338 | 0.749885184 |
|           | ENSG00000234928 | lincRNA               | 15.42709392 | 37.71041554 | 2.444427689 |
|           | ENSG00000203635 | lincRNA               | 151.9400529 | 273.3946257 | 1.7993585   |
|           | ENSG00000253669 | lincRNA               | 68.55651421 | 119.3415158 | 1.740775726 |
|           | ENSG00000224071 | processed_pseudogen   | 86.48341154 | 147.1509459 | 1.701493307 |
|           | ENSG00000235996 | antisense             | 81.2325813  | 134.0857439 | 1.65063995  |
|           | ENSG00000218416 | processed_transcript  | 234.9871924 | 369.5012451 | 1.572431422 |
|           | ENSG00000235078 | antisense             | 568.1753824 | 796.5354449 | 1.401918262 |
|           | ENSG00000245330 | lincRNA               | 508.2002149 | 693.5649336 | 1.364747423 |
|           | ENSG00000259424 | antisense             | 333.6313004 | 451.3512829 | 1.352844539 |
|           | ENSG00000234432 | lincRNA               | 307.5642549 | 412.3967599 | 1.340847492 |
|           | ENSG00000229273 | processed_pseudogen   | 330.9396088 | 437.4712669 | 1.321906642 |
|           | ENSG00000177738 | sense_overlapping     | 510.9062593 | 672.710281  | 1.316700018 |
|           | ENSG00000170161 | lincRNA               | 412.8244181 | 540.9209785 | 1.31029308  |

Supp Table 2

| GOTERM_BP_FAT                                                                 | Count | %           | PValue      |
|-------------------------------------------------------------------------------|-------|-------------|-------------|
| GO:0007155~cell adhesion                                                      | 18    | 1.074626866 | 2.38E-04    |
| GO:0022610~biological adhesion                                                | 18    | 1.074626866 | 2.42E-04    |
| GO:0044057~regulation of system process                                       | 10    | 0.597014925 | 0.002273047 |
| GO:0001501~skeletal system development                                        | 10    | 0.597014925 | 0.002814296 |
| GO:0044259~multicellular organismal macromolecule metabolic process           | 4     | 0.23880597  | 0.002865926 |
| GO:0044236~multicellular organismal metabolic process                         | 4     | 0.23880597  | 0.004758699 |
| GO:0045823~positive regulation of heart contraction                           | 3     | 0.179104478 | 0.007167566 |
| GO:0001666~response to hypoxia                                                | 6     | 0.358208955 | 0.00804856  |
| GO:0042060~wound healing                                                      | 7     | 0.417910448 | 0.008589641 |
| GO:0070482~response to oxygen levels                                          | 6     | 0.358208955 | 0.009905971 |
| GO:0050878~regulation of body fluid levels                                    | 6     | 0.358208955 | 0.009905971 |
| GO:0007610~behavior                                                           | 11    | 0.656716418 | 0.0116085   |
| GO:0042127~regulation of cell proliferation                                   | 15    | 0.895522388 | 0.01382459  |
| GO:0050817~coagulation                                                        | 5     | 0.298507463 | 0.014733089 |
| GO:0007596~blood coagulation                                                  | 5     | 0.298507463 | 0.014733089 |
| GO:0030198~extracellular matrix organization                                  | 5     | 0.298507463 | 0.015720064 |
| GO:0000902~cell morphogenesis                                                 | 9     | 0.537313433 | 0.017450109 |
| GO:0007599~hemostasis                                                         | 5     | 0.298507463 | 0.01781666  |
| GO:0009725~response to hormone stimulus                                       | 9     | 0.537313433 | 0.020534546 |
| GO:0044243~multicellular organismal catabolic process                         | 3     | 0.179104478 | 0.023818905 |
| GO:0033692~cellular polysaccharide biosynthetic process                       | 3     | 0.179104478 | 0.023818905 |
| GO:0000904~cell morphogenesis involved in differentiation                     | 7     | 0.417910448 | 0.025704135 |
| GO:0032963~collagen metabolic process                                         | 3     | 0.179104478 | 0.027374232 |
| GO:0032989~cellular component morphogenesis                                   | 9     | 0.537313433 | 0.030891029 |
| GO:0048545~response to steroid hormone stimulus                               | 6     | 0.358208955 | 0.032741764 |
| GO:0009719~response to endogenous stimulus                                    | 9     | 0.537313433 | 0.034169098 |
| GO:0008016~regulation of heart contraction                                    | 4     | 0.23880597  | 0.034355874 |
| GO:0010033~response to organic substance                                      | 13    | 0.776119403 | 0.034551433 |
| GO:0050804~regulation of synaptic transmission                                | 5     | 0.298507463 | 0.037308584 |
| GO:0060284~regulation of cell development                                     | 6     | 0.358208955 | 0.041539004 |
| GO:0008361~regulation of cell size                                            | 6     | 0.358208955 | 0.042269538 |
| GO:0051969~regulation of transmission of nerve impulse                        | 5     | 0.298507463 | 0.047356184 |
| GO:0030335~positive regulation of cell migration                              | 4     | 0.23880597  | 0.049301038 |
| GO:0008285~negative regulation of cell proliferation                          | 8     | 0.47761194  | 0.050087201 |
| GO:0010817~regulation of hormone levels                                       | 5     | 0.298507463 | 0.051347713 |
| GO:0030900~forebrain development                                              | 5     | 0.298507463 | 0.052373638 |
| GO:0031644~regulation of neurological system process                          | 5     | 0.298507463 | 0.053410753 |
| GO:0051272~positive regulation of cell motion                                 | 4     | 0.23880597  | 0.06226363  |
| GO:0040017~positive regulation of locomotion                                  | 4     | 0.23880597  | 0.06226363  |
| GO:0034446~substrate adhesion-dependent cell spreading                        | 2     | 0.119402985 | 0.062928625 |
| GO:0033628~regulation of cell adhesion mediated by integrin                   | 2     | 0.119402985 | 0.062928625 |
| GO:0043062~extracellular structure organization                               | 5     | 0.298507463 | 0.064392977 |
| GO:0000271~polysaccharide biosynthetic process                                | 3     | 0.179104478 | 0.064818849 |
| GO:0030814~regulation of cAMP metabolic process                               | 4     | 0.23880597  | 0.070082082 |
| GO:0030334~regulation of cell migration                                       | 5     | 0.298507463 | 0.071508763 |
| GO:0043094~cellular metabolic compound salvage                                | 2     | 0.119402985 | 0.071591736 |
| GO:0006928~cell motion                                                        | 9     | 0.537313433 | 0.073195003 |
| GO:0016042~lipid catabolic process                                            | 5     | 0.298507463 | 0.076467786 |
| GO:0010648~negative regulation of cell communication                          | 6     | 0.358208955 | 0.080000363 |
| GO:0019934~cGMP-mediated signaling                                            | 2     | 0.119402985 | 0.080175392 |
| GO:0008277~regulation of G-protein coupled receptor protein signaling pathway | 3     | 0.179104478 | 0.080586058 |
| GO:0007611~learning or memory                                                 | 4     | 0.23880597  | 0.083459604 |
| GO:0005976~polysaccharide metabolic process                                   | 4     | 0.23880597  | 0.083459604 |
| GO:0044264~cellular polysaccharide metabolic process                          | 3     | 0.179104478 | 0.08608144  |
| GO:0030799~regulation of cyclic nucleotide metabolic process                  | 4     | 0.23880597  | 0.086963964 |
| GO:0010460~positive regulation of heart rate                                  | 2     | 0.119402985 | 0.088680317 |
| GO:0031175~neuron projection development                                      | 6     | 0.358208955 | 0.088733645 |
| GO:0042476~odontogenesis                                                      | 3     | 0.179104478 | 0.088870628 |
| GO:0001503~ossification                                                       | 4     | 0.23880597  | 0.09052999  |
| GO:0008544~epidermis development                                              | 5     | 0.298507463 | 0.090969649 |
| GO:0006140~regulation of nucleotide metabolic process                         | 4     | 0.23880597  | 0.092335755 |
| GO:0048666~neuron development                                                 | 7     | 0.417910448 | 0.094286717 |
| GO:0005978~glycogen biosynthetic process                                      | 2     | 0.119402985 | 0.097107226 |
| GO:0009250~glucan biosynthetic process                                        | 2     | 0.119402985 | 0.097107226 |
| GO:0034330~cell junction organization                                         | 3     | 0.179104478 | 0.097395421 |
| GO:0006811~ion transport                                                      | 12    | 0.71641791  | 0.098214518 |

| <b>Supp Table 2</b>                                   |              |          |               |
|-------------------------------------------------------|--------------|----------|---------------|
| <b>GOTERM_CC_FAT</b>                                  | <b>Count</b> | <b>%</b> | <b>PValue</b> |
| GO:0044459~plasma membrane part                       | 46           | 2.75     | 5.7E-07       |
| GO:0044421~extracellular region part                  | 27           | 1.61     | 2.1E-06       |
| GO:0005886~plasma membrane                            | 63           | 3.76     | 3.5E-06       |
| GO:0005576~extracellular region                       | 41           | 2.45     | 6.4E-06       |
| GO:0005615~extracellular space                        | 21           | 1.25     | 1.3E-05       |
| GO:0031012~extracellular matrix                       | 13           | 0.78     | 1.6E-04       |
| GO:0005578~proteinaceous extracellular matrix         | 12           | 0.72     | 3.4E-04       |
| GO:0030141~secretory granule                          | 8            | 0.48     | 2.1E-03       |
| GO:0031091~platelet alpha granule                     | 5            | 0.30     | 2.3E-03       |
| GO:0044420~extracellular matrix part                  | 6            | 0.36     | 6.2E-03       |
| GO:0005911~cell-cell junction                         | 7            | 0.42     | 1.2E-02       |
| GO:0005887~integral to plasma membrane                | 21           | 1.25     | 1.3E-02       |
| GO:0030054~cell junction                              | 12           | 0.72     | 1.4E-02       |
| GO:0031226~intrinsic to plasma membrane               | 21           | 1.25     | 1.7E-02       |
| GO:0042383~sarcolemma                                 | 4            | 0.24     | 2.9E-02       |
| GO:0031982~vesicle                                    | 13           | 0.78     | 3.4E-02       |
| GO:0044433~cytoplasmic vesicle part                   | 6            | 0.36     | 3.9E-02       |
| GO:0005604~basement membrane                          | 4            | 0.24     | 4.3E-02       |
| GO:0016023~cytoplasmic membrane-bounded vesicle       | 11           | 0.66     | 4.7E-02       |
| GO:0031410~cytoplasmic vesicle                        | 12           | 0.72     | 5.5E-02       |
| GO:0031988~membrane-bounded vesicle                   | 11           | 0.66     | 5.6E-02       |
| GO:0032839~dendrite cytoplasm                         | 2            | 0.12     | 5.8E-02       |
| GO:0005741~mitochondrial outer membrane               | 4            | 0.24     | 6.0E-02       |
| GO:0031093~platelet alpha granule lumen               | 3            | 0.18     | 6.2E-02       |
| GO:0032838~cell projection cytoplasm                  | 2            | 0.12     | 6.8E-02       |
| GO:0060205~cytoplasmic membrane-bounded vesicle lumen | 3            | 0.18     | 7.1E-02       |
| GO:0031983~vesicle lumen                              | 3            | 0.18     | 7.6E-02       |
| GO:0031968~organelle outer membrane                   | 4            | 0.24     | 8.5E-02       |
| GO:0043025~cell soma                                  | 5            | 0.30     | 8.6E-02       |
| GO:0070161~anchoring junction                         | 5            | 0.30     | 9.2E-02       |
| GO:0019867~outer membrane                             | 4            | 0.24     | 9.3E-02       |
| GO:0031092~platelet alpha granule membrane            | 2            | 0.12     | 9.5E-02       |

### Supplementary Table 3

#### Cloning/mutation Primers

|                         |                                    |                          |                        |
|-------------------------|------------------------------------|--------------------------|------------------------|
| <b>TRIM24-K723R-For</b> | TGCTGGAGCCAATTCGAATAAGACAAGAAAACAG |                          |                        |
| <b>TRIM24-K723R-Rev</b> | ATAAGCTTAACCGAGGTCGTA CTGGTGACC    |                          |                        |
| <b>TRIM24-K741R-For</b> | ATTTCCCTGTTGTTATAGTGAGGCAAGAATCAG  |                          |                        |
| <b>TRIM24-K741R-Rev</b> | GTGATATTGTTGTCCCTTTAGTATTTAAAAG    |                          |                        |
|                         |                                    |                          |                        |
| <b>qRT-PCR primers</b>  |                                    |                          |                        |
| <b>Gene</b>             | <b>Species</b>                     | <b>Forward primer</b>    | <b>Reverse primer</b>  |
| TRIM24                  | Human                              | GTGGATCAGCAAGCAGGAG      | TTTGTCAAGAAAGGGTGTAACG |
| $\beta$ -ACTIN          | Human                              | GGACTTCGAGCAAGAGATGG     | AGCACTGTGTTGGCGTACAG   |
| CDH18                   | Human                              | CACCACAGCTCCATCAAGGT     | TGGAGTGCAGCTTTCCAACA   |
| PGM5                    | Human                              | CAACGGGATTGGACGACT       | TCTGAGACAACATCGGGTGC   |
| COL3A1                  | Human                              | GCAGGGTCTCCTGGTTCAA      | CGGGACCCATTTGCCTTTA    |
| FN1                     | Human                              | ACAAACACTAATGTTAATTGCCCA | GAACTCTAAGCTGGGTCTGCT  |
| LAMB1                   | Human                              | GATTGGACGTCAGTGCAACG     | CCACTATGCTAACCCAGGC    |
| AZGP1                   | Human                              | CGACAGTAACGGGTCTCACG     | TTGGTTATCTGGGCTGCTGG   |



### Supp Table 4

#### List of Antibodies

| 1  | Acetylated-lysine (Pan-Ac) (Cell signaling, 9441) |
|----|---------------------------------------------------|
| 2  | Actin-HRP (Cell Signaling, 5125)                  |
| 3  | FLAG-HRP (Sigma, A8592)                           |
| 4  | GAPDH (GeneTex, GTX627408)                        |
| 5  | H3 (Active Motif, 61277)                          |
| 6  | H3K23ac (Active Motif, 39131)                     |
| 7  | HA (Roche, 11583816001)                           |
| 8  | Lamin B (Santa Cruz, sc-6217)                     |
| 9  | p84 (GeneTex, GTX70220)                           |
| 10 | SUMO1 (Cell signaling, 4930)                      |
| 11 | SUMO2/3 (Cell signaling, 4971)                    |
| 12 | TRIM24 (Novus Biologicals, NB100-2597)            |
| 13 | TRIM28 (KAP1) (Abcam, ab22553)                    |
| 14 | TRIM33 (Bethyl A301-060A)                         |
|    |                                                   |
